# Supplementary material for: Inhibition of FOXO1-mediated autophagy promotes paclitaxel-induced apoptosis of MDA-MB-231 cells
Source: PubMed Central journal article supplement — Mol Med Rep. 2022 Jan 5;25(2):72. doi: 10.3892/mmr.2022.12588 (PMC8767459; doi:10.3892/mmr.2022.12588), 2022-01-05
Supplement: Supplementary_Data.pdf [file Supplementary_Data.pdf]

Figure S1. Apoptosis and autophagy in HCC-1937 cells after treatment with 10, 20 and 30 nM PTX. (A) Photomicrographs of MDA-MB-231 and HCC-1937 cells exposed to paclitaxel for 24 h. (B) Protein expression of Bcl-2 and Bax in HCC-1937 cells. (C) The semi-quantification of Bcl-2/Bax protein expression in HCC-1937 cells. \* $P < 0.05$  vs. 0 nM PTX. (D) The protein expression of P62 in HCC-1937 cells. (E) The semi-quantification of P62 protein expression in HCC-1937 cells. (F) The protein expression of LC3 in HCC-1937 cells. (G) The semi-quantification of LC3-II/LC3-I protein expression in HCC-1937 cells. \* $P < 0.05$  vs. 0 nM PTX. PTX, paclitaxel; LC3, light chain 3.

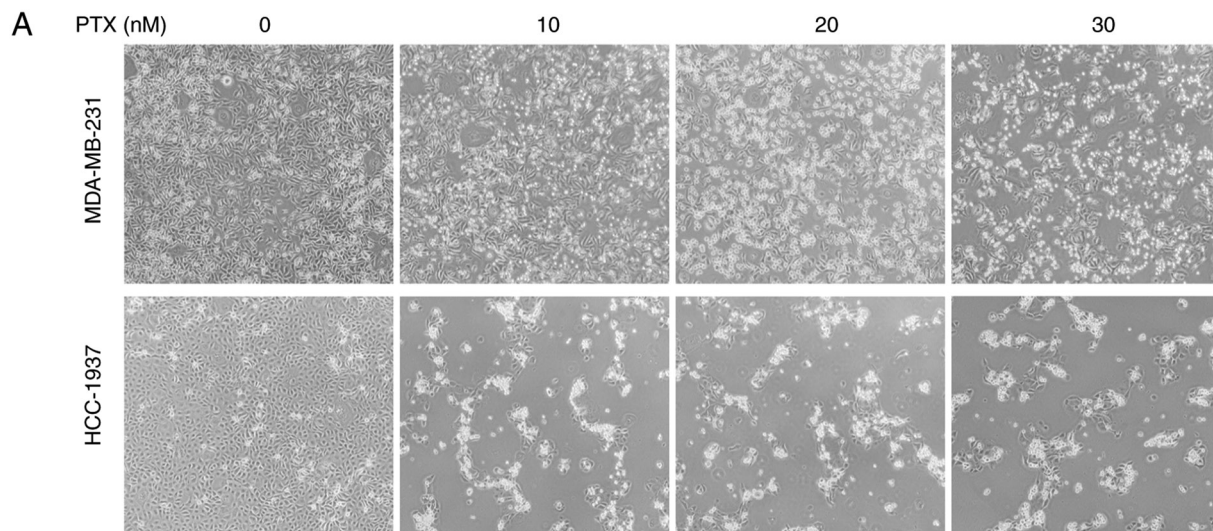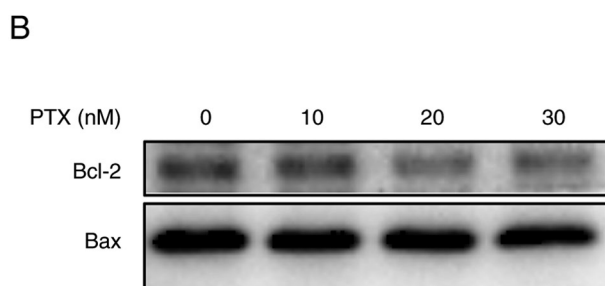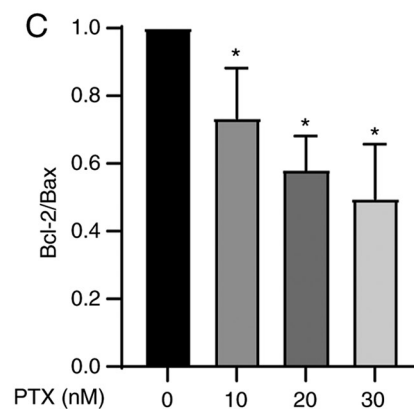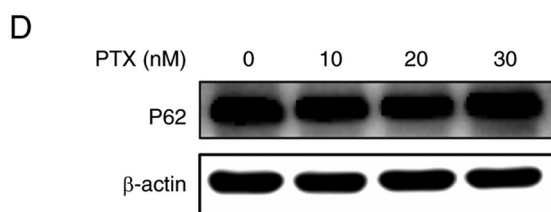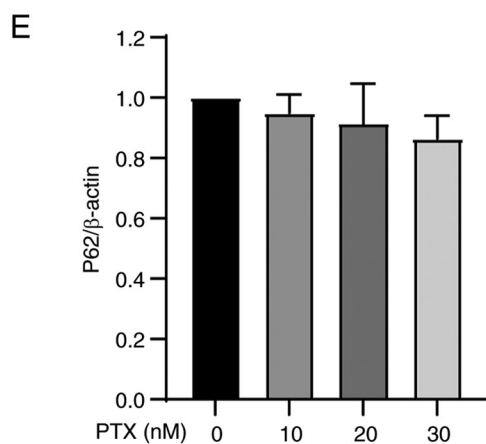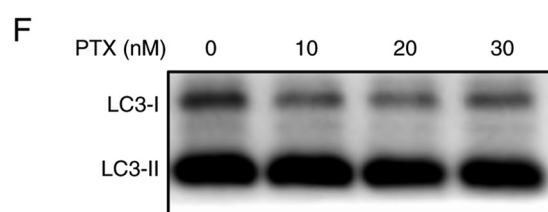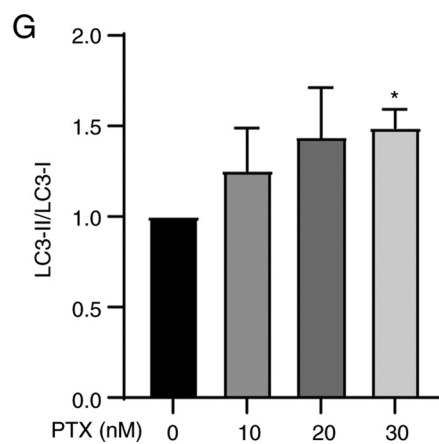

Table SI. Primer sequences for reverse transcription-quantitative PCR.

| Primer          | Sequence (5'→3')                                            |
|-----------------|-------------------------------------------------------------|
| <i>SESNI</i>    | F: CCCCTACATTATCGTCACTACA<br>R: CAAGGTCTATGGGCTAACACT       |
| <i>PTEN</i>     | F: TTGACCAATGGCTAAGTGAAG<br>R: AATACCTCCTGTAGGATCTGC        |
| <i>mTOR</i>     | F: TTACCGCTGAGTACGTGGAATT<br>R: AATGTTGTCAAAGAAGGGTTGC      |
| <i>EPG5</i>     | F: GCTTTTGAACTACTCACGATG<br>R: ACTCTTTGGTAGCGATGATAG        |
| <i>TSC1</i>     | F: AAATTCCACCTCCGACGAGA<br>R: TCAGTCTGTCCAGCACTTCCA         |
| <i>AKT</i>      | F: CGGCAAGGTGATCCTGGTGAA<br>R: CGGTCTGGGTCTGGAAAGAGTA       |
| <i>LKB1</i>     | F: ACATCTGGTCGGCTGGGGTCA<br>R: CGGTTCTGACTCAAGCATCCCTTT     |
| <i>FOXO1</i>    | F: ATGGCAGCCAGGCATCTCATA<br>R: CTTGGGTCAGGCGGTTTCATAC       |
| <i>LMNA</i>     | F: TAGACCCTGGGTGGGCTCTGTG<br>R: GGAGGCAAGGGCTCTTTAGCG       |
| <i>AMARBI</i>   | F: TAATGTGAATAGAGGAACAAGTGGGTAT<br>R: AACAGGTGGACAGGGCAAAGC |
| <i>DRAM1</i>    | F: CAGGGTACTGTTTATTTGCTCCTT<br>R: CATTCAAGGGCTGCTGCTTCTTC   |
| <i>DRAM2</i>    | F: ATGATTATGATTCTCAGGGAT<br>R: AAAGTATAGGCATAGGTGTTTT       |
| <i>ATG5</i>     | F: CAGAATGCAGGGAACACTAAG<br>R: GATGCTGGTACAATAATGAATGAG     |
| <i>BECN1</i>    | F: TGAGGGATGGAAGGGTCTAAG<br>R: CCTGGGCTGTGGTAAGTAATG        |
| <i>VPS34</i>    | F: GTACAACGCGAAAGTGGAAT<br>R: AACAACTGTGCAGGCATAAGG         |
| <i>ATG4B</i>    | F: TGTGATGGAGGAAATCAGAAGGTTG<br>R: CCTCGTTGATGTCCGTGAGCC    |
| <i>MAP1LC3B</i> | F: CGCTTACAGCTCAATGCTAAT<br>R: ACTGACAATTCATCCCGAAC         |
| <i>GAPDH</i>    | F: GGCGCTGAGTACGTCGTGGAGT<br>R: AGTTGGTGGTGCAGGAGGCATT      |

F, forward; R, reverse; *FOXO1*, forkhead box transcription factor O1; *SESNI*, sestrin 1; *PTEN*, phosphatase and tensin homolog; *mTOR*, mechanistic target of rapamycin kinase; *EPG5*, ectopic P-granules autophagy protein 5 homolog; *TSC1*, TSC complex subunit 1; *AKT*, serine/threonine kinase 1; *LKB1*, serine/threonine kinase 11; *LMNA*, lamin A/C; *AMBRA1*, autophagy and beclin 1 regulator 1; *DRAM1*, DNA damage regulated autophagy modulator 1; *DRAM2*, DNA damage regulated autophagy modulator 2; *ATG5*, autophagy related 5; *VPS34*, class III phosphoinositide 3-kinase vacuolar protein sorting 34; *ATG4B*, autophagy related 4B cysteine peptidase; *BECN1*, beclin 1; *MAP1LC3B*, microtubule associated protein 1 light chain 3β.

Table SII. Pool of three sequences for human *FOXO1* siRNA.

| Number | Sense                 | Antisense             |
|--------|-----------------------|-----------------------|
| 1      | GCAUCCAUGGACAACAACAtt | UGUUGUUGUCCAUGGAUGCtt |
| 2      | GAAGGGGAUGUGCAUUCUAtt | UAGAAUGCACAUCCCCUUCtt |
| 3      | CCACACAGUGUCAAGACAAtt | UUGUCUUGACACUGUGUGGtt |

FOXO1, forkhead box transcription factor O1; siRNA, small interfering RNA.
